# Supplementary material for: Transcriptomic and metabolic regulatory network characterization of drought responses in tobacco
Source: Frontiers journal article supplement (doi:10.3389/fpls.2022.1067076), 2023-01-18
Supplement: Data_Sheet_2.zip [file Data_Sheet_2.zip]

## Sheet: Sheet1
Nitab4.5_0000063g0340.1	Down-regulated genes
Nitab4.5_0001360g0220.1	Nitab4.5_0000063g0340
Nitab4.5_0000446g0180.1	Nitab4.5_0001360g0220
Nitab4.5_0000055g0060.1	Nitab4.5_0000446g0180
Nitab4.5_0000407g0010.1	Nitab4.5_0000055g0060
Nitab4.5_0000163g0340.1	Nitab4.5_0000407g0010
Nitab4.5_0000677g0040.1	Nitab4.5_0000163g0340
Nitab4.5_0000483g0140.1	Nitab4.5_0000677g0040
Nitab4.5_0003030g0130.1	Nitab4.5_0000483g0140
Nitab4.5_0003016g0020.1	Nitab4.5_0003030g0130
Nitab4.5_0000742g0170.1	Nitab4.5_0003016g0020
Nitab4.5_0000102g0050.1	Nitab4.5_0000742g0170
Nitab4.5_0000041g0390.1	Nitab4.5_0000102g0050
Nitab4.5_0000019g0250.1	Nitab4.5_0000041g0390
Nitab4.5_0004657g0030.1	Nitab4.5_0000019g0250
Nitab4.5_0000021g0160.1	Nitab4.5_0004657g0030
Nitab4.5_0002494g0050.1	Nitab4.5_0000021g0160
Nitab4.5_0000628g0180.1	Nitab4.5_0002494g0050
Nitab4.5_0003006g0030.1	Nitab4.5_0000628g0180
Nitab4.5_0007207g0030.1	Nitab4.5_0003006g0030
Nitab4.5_0003353g0040.1	Nitab4.5_0007207g0030
Nitab4.5_0002314g0100.1	Nitab4.5_0003353g0040
Nitab4.5_0000382g0110.1	Nitab4.5_0002314g0100
Nitab4.5_0000568g0140.1	Nitab4.5_0000382g0110
Nitab4.5_0000078g0270.1	Nitab4.5_0000568g0140
Nitab4.5_0000543g0170.1	Nitab4.5_0000078g0270
Nitab4.5_0001478g0040.1	Nitab4.5_0000543g0170
Nitab4.5_0002688g0010.1	Nitab4.5_0001478g0040
Nitab4.5_0000403g0110.1	Nitab4.5_0002688g0010
Nitab4.5_0001925g0200.1	Nitab4.5_0000403g0110
Nitab4.5_0000222g0350.1	Nitab4.5_0001925g0200
Nitab4.5_0001051g0060.1	Nitab4.5_0000222g0350
Nitab4.5_0000104g0310.1	Nitab4.5_0001051g0060
Nitab4.5_0000057g0280.1	Nitab4.5_0000104g0310
Nitab4.5_0001170g0050.1	Nitab4.5_0000057g0280
Nitab4.5_0001382g0020.1	Nitab4.5_0001170g0050
Nitab4.5_0007189g0010.1	Nitab4.5_0001382g0020
Nitab4.5_0000477g0210.1	Nitab4.5_0007189g0010
Nitab4.5_0001942g0140.1	Nitab4.5_0000477g0210
Nitab4.5_0000742g0160.1	Nitab4.5_0001942g0140
Nitab4.5_0001231g0010.1	Nitab4.5_0000742g0160
Nitab4.5_0002015g0090.1	Nitab4.5_0001231g0010
Nitab4.5_0002015g0030.1	Nitab4.5_0002015g0090
Nitab4.5_0000152g0250.1	Nitab4.5_0002015g0030
Nitab4.5_0001244g0130.1	Nitab4.5_0000152g0250
Nitab4.5_0002052g0080.1	Nitab4.5_0001244g0130
Nitab4.5_0004752g0020.1	Nitab4.5_0002052g0080
Nitab4.5_0000845g0040.1	Nitab4.5_0004752g0020
Nitab4.5_0004475g0020.1	Nitab4.5_0000845g0040
Nitab4.5_0006338g0040.1	Nitab4.5_0004475g0020
Nitab4.5_0002401g0030.1	Nitab4.5_0006338g0040
Nitab4.5_0000208g0350.1	Nitab4.5_0002401g0030
Nitab4.5_0003323g0020.1	Nitab4.5_0000208g0350
Nitab4.5_0003030g0040.1	Nitab4.5_0003323g0020
Nitab4.5_0005860g0020.1	Nitab4.5_0003030g0040
Nitab4.5_0000151g0340.1	Nitab4.5_0005860g0020
Nitab4.5_0002986g0060.1	Nitab4.5_0000151g0340
Nitab4.5_0000016g0140.1	Nitab4.5_0002986g0060
Nitab4.5_0001544g0150.1	Nitab4.5_0000016g0140
Nitab4.5_0003592g0010.1	Nitab4.5_0001544g0150
Nitab4.5_0000312g0240.1	Nitab4.5_0003592g0010
Nitab4.5_0002684g0190.1	Nitab4.5_0000312g0240
Nitab4.5_0000295g0070.1	Nitab4.5_0002684g0190
Nitab4.5_0001244g0180.1	Nitab4.5_0000295g0070
Nitab4.5_0000728g0010.1	Nitab4.5_0001244g0180
Nitab4.5_0000767g0010.1	Nitab4.5_0000728g0010
Nitab4.5_0001740g0070.1	Nitab4.5_0000767g0010
Nitab4.5_0000227g0130.1	Nitab4.5_0001740g0070
Nitab4.5_0004849g0030.1	Nitab4.5_0000227g0130
Nitab4.5_0008249g0010.1	Nitab4.5_0004849g0030
Nitab4.5_0001860g0020.1	Nitab4.5_0008249g0010
Nitab4.5_0000418g0050.1	Nitab4.5_0001860g0020
Nitab4.5_0000078g0260.1	Nitab4.5_0000418g0050
Nitab4.5_0001170g0070.1	Nitab4.5_0000078g0260
Nitab4.5_0000912g0250.1	Nitab4.5_0001170g0070
Nitab4.5_0000659g0130.1	Nitab4.5_0000912g0250
Nitab4.5_0000349g0120.1	Nitab4.5_0000659g0130
Nitab4.5_0001143g0050.1	Nitab4.5_0000349g0120
Nitab4.5_0000246g0260.1	Nitab4.5_0001143g0050
Nitab4.5_0004987g0030.1	Nitab4.5_0000246g0260
	Nitab4.5_0004987g0030
	Nitab4.5_0000305g0170
	Nitab4.5_0002904g0040
	Nitab4.5_0002155g0090
	Nitab4.5_0000759g0040
	Nitab4.5_0003180g0060
	Nitab4.5_0000270g0090
	Nitab4.5_0000283g0430
	Nitab4.5_0000072g0590
	Nitab4.5_0000010g0190
	Nitab4.5_0001180g0150
	Nitab4.5_0002287g0080
	Nitab4.5_0000206g0170
	Nitab4.5_0000564g0230
	Nitab4.5_0000188g0100
	Nitab4.5_0000009g0510
	Nitab4.5_0000145g0180
	Nitab4.5_0001740g0080
	Nitab4.5_0002977g0140
	Nitab4.5_0002522g0040
	Nitab4.5_0003152g0100
	Nitab4.5_0000495g0060
	Nitab4.5_0001135g0140
	Nitab4.5_0000121g0260
	Nitab4.5_0003952g0070
	Nitab4.5_0003152g0070
	Nitab4.5_0002860g0030
	Nitab4.5_0002783g0040
	Nitab4.5_0002265g0140
	Nitab4.5_0000935g0120
	Nitab4.5_0002986g0020
	Nitab4.5_0002503g0040
	Nitab4.5_0002311g0040
	Nitab4.5_0000123g0220
	Nitab4.5_0000697g0070
	Nitab4.5_0001438g0130
	Nitab4.5_0001740g0140
	Nitab4.5_0000119g0360
	Nitab4.5_0000381g0020
	Nitab4.5_0000588g0290
	Nitab4.5_0000512g0230
	Nitab4.5_0000363g0080
	Nitab4.5_0001740g0030
	Nitab4.5_0004047g0040
	Nitab4.5_0002616g0140
	Nitab4.5_0001740g0120
	Nitab4.5_0002977g0130
	Nitab4.5_0000970g0130
	Nitab4.5_0000605g0060
	Nitab4.5_0002526g0070
	Nitab4.5_0007186g0040
	Nitab4.5_0004841g0030
	Nitab4.5_0002140g0060
	Nitab4.5_0000757g0070
	Nitab4.5_0000786g0220
	Nitab4.5_0002516g0050
	Nitab4.5_0000355g0180
	Nitab4.5_0000036g0170
	Nitab4.5_0003846g0020
	Nitab4.5_0001143g0020
	Nitab4.5_0000745g0090
	Nitab4.5_0002977g0010
	Nitab4.5_0001494g0130
	Nitab4.5_0000635g0190
	Nitab4.5_0001151g0020
	Nitab4.5_0000481g0010
	Nitab4.5_0001986g0120
	Nitab4.5_0006893g0010
	Nitab4.5_0002575g0070
	Nitab4.5_0004360g0070
	Nitab4.5_0000965g0100
	Nitab4.5_0003953g0040
	Nitab4.5_0003063g0040
	Nitab4.5_0000005g0550
	Nitab4.5_0000278g0050
	Nitab4.5_0000344g0220
	Nitab4.5_0001664g0080
	Nitab4.5_0001106g0080
	Nitab4.5_0000430g0110
	Nitab4.5_0005427g0020
Nitab4.5_0000889g0030.1	Nitab4.5_0001320g0010
Nitab4.5_0000944g0090.1	Nitab4.5_0000889g0030
Nitab4.5_0000212g0100.1	Nitab4.5_0000944g0090
Nitab4.5_0001542g0080.1	Nitab4.5_0000212g0100
Nitab4.5_0003579g0010.1	Nitab4.5_0001542g0080
Nitab4.5_0003618g0040.1	Nitab4.5_0003579g0010
Nitab4.5_0000363g0020.1	Nitab4.5_0003618g0040
Nitab4.5_0000708g0030.1	Nitab4.5_0000363g0020
Nitab4.5_0000024g0190.1	Nitab4.5_0000708g0030
Nitab4.5_0000129g0180.1	Nitab4.5_0000024g0190
Nitab4.5_0004987g0050.1	Nitab4.5_0000129g0180
Nitab4.5_0002124g0010.1	Nitab4.5_0004987g0050
Nitab4.5_0002388g0020.1	Nitab4.5_0002124g0010
Nitab4.5_0004301g0080.1	Nitab4.5_0002388g0020
Nitab4.5_0002334g0020.1	Nitab4.5_0004301g0080
Nitab4.5_0000136g0200.1	Nitab4.5_0002334g0020
Nitab4.5_0000123g0570.1	Nitab4.5_0000136g0200
Nitab4.5_0002957g0010.1	Nitab4.5_0000123g0570
Nitab4.5_0000969g0040.1	Nitab4.5_0002957g0010
Nitab4.5_0001088g0140.1	Nitab4.5_0000969g0040
Nitab4.5_0002543g0030.1	Nitab4.5_0001088g0140
Nitab4.5_0001843g0170.1	Nitab4.5_0002543g0030
Nitab4.5_0007278g0010.1	Nitab4.5_0001843g0170
Nitab4.5_0002229g0180.1	Nitab4.5_0007278g0010
Nitab4.5_0004156g0010.1	Nitab4.5_0002229g0180
Nitab4.5_0000101g0310.1	Nitab4.5_0004156g0010
Nitab4.5_0000363g0030.1	Nitab4.5_0000101g0310
Nitab4.5_0000704g0090.1	Nitab4.5_0000363g0030
Nitab4.5_0000138g0030.1	Nitab4.5_0000704g0090
Nitab4.5_0000757g0080.1	Nitab4.5_0000138g0030
Nitab4.5_0000175g0030.1	Nitab4.5_0000757g0080
Nitab4.5_0000588g0230.1	Nitab4.5_0000175g0030
Nitab4.5_0000563g0020.1	Nitab4.5_0000588g0230
Nitab4.5_0000743g0020.1	Nitab4.5_0000563g0020
Nitab4.5_0000178g0330.1	Nitab4.5_0000743g0020
Nitab4.5_0000742g0020.1	Nitab4.5_0000178g0330
Nitab4.5_0003280g0030.1	Nitab4.5_0000742g0020
Nitab4.5_0000303g0330.1	Nitab4.5_0003280g0030
Nitab4.5_0000036g0010.1	Nitab4.5_0000303g0330
Nitab4.5_0009514g0050.1	Nitab4.5_0000036g0010
Nitab4.5_0000046g0160.1	Nitab4.5_0009514g0050
Nitab4.5_0001756g0180.1	Nitab4.5_0000046g0160
Nitab4.5_0003629g0020.1	Nitab4.5_0001756g0180
Nitab4.5_0000037g0330.1	Nitab4.5_0003629g0020
Nitab4.5_0003883g0030.1	Nitab4.5_0000037g0330
Nitab4.5_0000462g0110.1	Nitab4.5_0003883g0030
Nitab4.5_0000187g0040.1	Nitab4.5_0000462g0110
Nitab4.5_0007189g0060.1	Nitab4.5_0000187g0040
Nitab4.5_0000138g0050.1	Nitab4.5_0007189g0060
Nitab4.5_0000618g0010.1	Nitab4.5_0000138g0050
Nitab4.5_0000022g0400.1	Nitab4.5_0000618g0010
Nitab4.5_0004010g0070.1	Nitab4.5_0000022g0400
Nitab4.5_0001879g0160.1	Nitab4.5_0004010g0070
Nitab4.5_0004057g0050.1	Nitab4.5_0001879g0160
Nitab4.5_0001146g0080.1	Nitab4.5_0004057g0050
Nitab4.5_0000008g0870.1	Nitab4.5_0001146g0080
Nitab4.5_0000240g0150.1	Nitab4.5_0000008g0870
Nitab4.5_0010091g0010.1	Nitab4.5_0000240g0150
Nitab4.5_0000002g0360.1	Nitab4.5_0010091g0010
Nitab4.5_0002102g0030.1	Nitab4.5_0000002g0360
Nitab4.5_0002311g0050.1	Nitab4.5_0002102g0030
Nitab4.5_0000038g0150.1	Nitab4.5_0002311g0050
Nitab4.5_0000726g0070.1	Nitab4.5_0000038g0150
Nitab4.5_0004398g0070.1	Nitab4.5_0000726g0070
Nitab4.5_0000014g0440.1	Nitab4.5_0004398g0070
Nitab4.5_0001274g0040.1	Nitab4.5_0000014g0440
Nitab4.5_0001223g0010.1	Nitab4.5_0001274g0040
Nitab4.5_0000703g0220.1	Nitab4.5_0001223g0010
Nitab4.5_0000564g0140.1	Nitab4.5_0000703g0220
Nitab4.5_0000430g0010.1	Nitab4.5_0000564g0140
Nitab4.5_0000907g0080.1	Nitab4.5_0000430g0010
Nitab4.5_0000564g0190.1	Nitab4.5_0000907g0080
Nitab4.5_0000716g0020.1	Nitab4.5_0000564g0190
Nitab4.5_0000302g0110.1	Nitab4.5_0000716g0020
Nitab4.5_0000458g0080.1	Nitab4.5_0000302g0110
Nitab4.5_0000378g0020.1	Nitab4.5_0000458g0080
Nitab4.5_0001246g0050.1	Nitab4.5_0000378g0020
Nitab4.5_0001662g0020.1	Nitab4.5_0001246g0050
Nitab4.5_0000981g0070.1	Nitab4.5_0001662g0020
Nitab4.5_0000519g0150.1	Nitab4.5_0000981g0070
Nitab4.5_0000610g0050.1	Nitab4.5_0000519g0150
Nitab4.5_0000516g0110.1	Nitab4.5_0000610g0050
Nitab4.5_0003638g0010.1	Nitab4.5_0000516g0110
Nitab4.5_0002826g0090.1	Nitab4.5_0003638g0010
Nitab4.5_0001657g0010.1	Nitab4.5_0002826g0090
Nitab4.5_0000292g0030.1	Nitab4.5_0001657g0010
Nitab4.5_0000742g0180.1	Nitab4.5_0000292g0030
Nitab4.5_0002237g0010.1	Nitab4.5_0000742g0180
Nitab4.5_0001106g0010.1	Nitab4.5_0002237g0010
Nitab4.5_0000142g0410.1	Nitab4.5_0001106g0010
Nitab4.5_0001276g0060.1	Nitab4.5_0000142g0410
Nitab4.5_0001533g0010.1	Nitab4.5_0001276g0060
Nitab4.5_0000368g0260.1	Nitab4.5_0001533g0010
Nitab4.5_0004592g0010.1	Nitab4.5_0000368g0260
Nitab4.5_0001056g0020.1	Nitab4.5_0004592g0010
Nitab4.5_0001210g0140.1	Nitab4.5_0001056g0020
Nitab4.5_0001936g0010.1	Nitab4.5_0001210g0140
Nitab4.5_0006036g0020.1	Nitab4.5_0001936g0010
Nitab4.5_0001171g0080.1	Nitab4.5_0006036g0020
Nitab4.5_0000073g0550.1	Nitab4.5_0001171g0080
Nitab4.5_0000021g0070.1	Nitab4.5_0000073g0550
Nitab4.5_0001402g0100.1	Nitab4.5_0000021g0070
Nitab4.5_0000712g0280.1	Nitab4.5_0001402g0100
Nitab4.5_0004436g0030.1	Nitab4.5_0000712g0280
Nitab4.5_0000944g0100.1	Nitab4.5_0004436g0030
Nitab4.5_0006658g0010.1	Nitab4.5_0000944g0100
Nitab4.5_0000046g0180.1	Nitab4.5_0006658g0010
Nitab4.5_0000430g0050.1	Nitab4.5_0000046g0180
Nitab4.5_0002340g0030.1	Nitab4.5_0000430g0050
Nitab4.5_0002114g0170.1	Nitab4.5_0002340g0030
Nitab4.5_0002655g0030.1	Nitab4.5_0002114g0170
Nitab4.5_0001772g0040.1	Nitab4.5_0002655g0030
Nitab4.5_0002238g0090.1	Nitab4.5_0001772g0040
Nitab4.5_0000742g0030.1	Nitab4.5_0002238g0090
Nitab4.5_0000085g0220.1	Nitab4.5_0000742g0030
Nitab4.5_0000610g0200.1	Nitab4.5_0000085g0220
Nitab4.5_0005200g0050.1	Nitab4.5_0000610g0200
Nitab4.5_0000318g0060.1	Nitab4.5_0005200g0050
Nitab4.5_0000024g0070.1	Nitab4.5_0000318g0060
Nitab4.5_0000363g0040.1	Nitab4.5_0000024g0070
Nitab4.5_0000550g0010.1	Nitab4.5_0000363g0040
Nitab4.5_0000377g0110.1	Nitab4.5_0000550g0010
Nitab4.5_0002347g0150.1	Nitab4.5_0000377g0110
Nitab4.5_0000062g0280.1	Nitab4.5_0002347g0150
Nitab4.5_0000037g0250.1	Nitab4.5_0000062g0280
Nitab4.5_0000472g0370.1	Nitab4.5_0000037g0250
Nitab4.5_0000573g0060.1	Nitab4.5_0000472g0370
Nitab4.5_0000212g0010.1	Nitab4.5_0000573g0060
Nitab4.5_0000102g0150.1	Nitab4.5_0000212g0010
Nitab4.5_0000561g0070.1	Nitab4.5_0000102g0150
Nitab4.5_0001495g0020.1	Nitab4.5_0000561g0070
Nitab4.5_0001176g0090.1	Nitab4.5_0001495g0020
Nitab4.5_0000218g0070.1	Nitab4.5_0001176g0090
Nitab4.5_0008961g0010.1	Nitab4.5_0000218g0070
Nitab4.5_0000402g0170.1	Nitab4.5_0008961g0010
Nitab4.5_0004358g0070.1	Nitab4.5_0000402g0170
Nitab4.5_0000604g0130.1	Nitab4.5_0004358g0070
Nitab4.5_0000263g0270.1	Nitab4.5_0000604g0130
Nitab4.5_0000923g0030.1	Nitab4.5_0000263g0270
Nitab4.5_0001114g0010.1	Nitab4.5_0000923g0030
Nitab4.5_0000706g0050.1	Nitab4.5_0001114g0010
Nitab4.5_0005418g0010.1	Nitab4.5_0000706g0050
Nitab4.5_0000307g0130.1	Nitab4.5_0005418g0010
Nitab4.5_0002707g0110.1	Nitab4.5_0000307g0130
Nitab4.5_0002428g0060.1	Nitab4.5_0002707g0110
Nitab4.5_0000302g0200.1	Nitab4.5_0002428g0060
Nitab4.5_0000194g0160.1	Nitab4.5_0000302g0200
Nitab4.5_0000417g0010.1	Nitab4.5_0000194g0160
Nitab4.5_0000021g0170.1	Nitab4.5_0000417g0010
Nitab4.5_0000508g0230.1	Nitab4.5_0000021g0170
Nitab4.5_0000052g0390.1	Nitab4.5_0000508g0230
Nitab4.5_0001638g0020.1	Nitab4.5_0000052g0390
Nitab4.5_0001278g0080.1	Nitab4.5_0001638g0020
Nitab4.5_0007178g0030.1	Nitab4.5_0001278g0080
Nitab4.5_0001508g0080.1	Nitab4.5_0007178g0030
Nitab4.5_0003285g0010.1	Nitab4.5_0001508g0080
Nitab4.5_0000207g0320.1	Nitab4.5_0003285g0010
Nitab4.5_0000264g0050.1	Nitab4.5_0000207g0320
Nitab4.5_0000063g0300.1	Nitab4.5_0000264g0050
Nitab4.5_0002817g0010.1	Nitab4.5_0000063g0300
Nitab4.5_0002477g0040.1	Nitab4.5_0002817g0010
Nitab4.5_0000223g0100.1	Nitab4.5_0002477g0040
Nitab4.5_0003280g0010.1	Nitab4.5_0000223g0100
Nitab4.5_0000062g0550.1	Nitab4.5_0003280g0010
Nitab4.5_0000136g0110.1	Nitab4.5_0000062g0550
Nitab4.5_0000192g0120.1	Nitab4.5_0000136g0110
Nitab4.5_0003168g0010.1	Nitab4.5_0000192g0120
Nitab4.5_0001117g0070.1	Nitab4.5_0003168g0010
Nitab4.5_0000571g0010.1	Nitab4.5_0001117g0070
Nitab4.5_0001204g0100.1	Nitab4.5_0000571g0010
Nitab4.5_0001052g0070.1	Nitab4.5_0001204g0100
Nitab4.5_0002353g0020.1	Nitab4.5_0001052g0070
Nitab4.5_0000291g0030.1	Nitab4.5_0002353g0020
Nitab4.5_0000019g0080.1	Nitab4.5_0000291g0030
Nitab4.5_0000340g0090.1	Nitab4.5_0000019g0080
Nitab4.5_0000575g0210.1	Nitab4.5_0000340g0090
Nitab4.5_0000175g0140.1	Nitab4.5_0000575g0210
Nitab4.5_0000250g0060.1	Nitab4.5_0000175g0140
Nitab4.5_0002140g0030.1	Nitab4.5_0000250g0060
Nitab4.5_0004038g0030.1	Nitab4.5_0002140g0030
Nitab4.5_0000130g0210.1	Nitab4.5_0004038g0030
Nitab4.5_0002273g0010.1	Nitab4.5_0000130g0210
Nitab4.5_0001287g0070.1	Nitab4.5_0002273g0010
Nitab4.5_0000496g0050.1	Nitab4.5_0001287g0070
Nitab4.5_0001842g0030.1	Nitab4.5_0000496g0050
Nitab4.5_0006836g0010.1	Nitab4.5_0001842g0030
Nitab4.5_0000104g0230.1	Nitab4.5_0006836g0010
Nitab4.5_0002561g0040.1	Nitab4.5_0000104g0230
Nitab4.5_0000101g0120.1	Nitab4.5_0002561g0040
Nitab4.5_0001075g0020.1	Nitab4.5_0000101g0120
Nitab4.5_0001187g0080.1	Nitab4.5_0001075g0020
Nitab4.5_0004361g0070.1	Nitab4.5_0001187g0080
Nitab4.5_0000401g0120.1	Nitab4.5_0004361g0070
Nitab4.5_0003018g0040.1	Nitab4.5_0000401g0120
Nitab4.5_0000745g0130.1	Nitab4.5_0003018g0040
Nitab4.5_0000537g0160.1	Nitab4.5_0000745g0130
Nitab4.5_0001225g0090.1	Nitab4.5_0000537g0160
Nitab4.5_0002695g0040.1	Nitab4.5_0001225g0090
Nitab4.5_0000919g0070.1	Nitab4.5_0002695g0040
Nitab4.5_0000106g0180.1	Nitab4.5_0000919g0070
Nitab4.5_0007026g0030.1	Nitab4.5_0000106g0180
Nitab4.5_0003337g0060.1	Nitab4.5_0007026g0030
Nitab4.5_0000109g0350.1	Nitab4.5_0003337g0060
Nitab4.5_0003089g0010.1	Nitab4.5_0000109g0350
Nitab4.5_0001496g0020.1	Nitab4.5_0003089g0010
Nitab4.5_0003336g0060.1	Nitab4.5_0001496g0020
Nitab4.5_0002322g0160.1	Nitab4.5_0003336g0060
Nitab4.5_0000046g0190.1	Nitab4.5_0002322g0160
Nitab4.5_0004144g0020.1	Nitab4.5_0000046g0190
Nitab4.5_0002107g0060.1	Nitab4.5_0004144g0020
Nitab4.5_0001301g0140.1	Nitab4.5_0002107g0060
Nitab4.5_0000622g0070.1	Nitab4.5_0001301g0140
Nitab4.5_0000173g0030.1	Nitab4.5_0000622g0070
Nitab4.5_0000037g0320.1	Nitab4.5_0000173g0030
Nitab4.5_0000175g0360.1	Nitab4.5_0000037g0320
Nitab4.5_0001644g0110.1	Nitab4.5_0000175g0360
Nitab4.5_0000499g0050.1	Nitab4.5_0001644g0110
Nitab4.5_0001140g0070.1	Nitab4.5_0000499g0050
Nitab4.5_0000550g0100.1	Nitab4.5_0001140g0070
Nitab4.5_0000136g0340.1	Nitab4.5_0000550g0100
Nitab4.5_0000377g0210.1	Nitab4.5_0000136g0340
Nitab4.5_0001366g0090.1	Nitab4.5_0000377g0210
Nitab4.5_0000363g0070.1	Nitab4.5_0001366g0090
Nitab4.5_0000023g0560.1	Nitab4.5_0000363g0070
Nitab4.5_0000045g0360.1	Nitab4.5_0000023g0560
Nitab4.5_0000024g0200.1	Nitab4.5_0000045g0360
Nitab4.5_0003381g0020.1	Nitab4.5_0000024g0200
Nitab4.5_0000342g0180.1	Nitab4.5_0003381g0020
Nitab4.5_0000021g0720.1	Nitab4.5_0000342g0180
Nitab4.5_0001315g0010.1	Nitab4.5_0000021g0720
Nitab4.5_0002809g0040.1	Nitab4.5_0001315g0010
Nitab4.5_0002017g0040.1	Nitab4.5_0002809g0040
Nitab4.5_0000151g0350.1	Nitab4.5_0002017g0040
Nitab4.5_0000934g0080.1	Nitab4.5_0000151g0350
Nitab4.5_0000198g0050.1	Nitab4.5_0000934g0080
Nitab4.5_0002661g0130.1	Nitab4.5_0000198g0050
Nitab4.5_0000982g0030.1	Nitab4.5_0002661g0130
Nitab4.5_0002778g0080.1	Nitab4.5_0000982g0030
Nitab4.5_0000989g0030.1	Nitab4.5_0002778g0080
Nitab4.5_0000986g0020.1	Nitab4.5_0000989g0030
Nitab4.5_0002783g0100.1	Nitab4.5_0000986g0020
Nitab4.5_0000056g0170.1	Nitab4.5_0002783g0100
Nitab4.5_0000193g0120.1	Nitab4.5_0000056g0170
Nitab4.5_0000280g0010.1	Nitab4.5_0000193g0120
Nitab4.5_0007346g0060.1	Nitab4.5_0000280g0010
Nitab4.5_0000106g0040.1	Nitab4.5_0007346g0060
Nitab4.5_0001386g0050.1	Nitab4.5_0000106g0040
Nitab4.5_0001204g0040.1	Nitab4.5_0001386g0050
Nitab4.5_0000354g0180.1	Nitab4.5_0001204g0040
Nitab4.5_0003062g0020.1	Nitab4.5_0000354g0180
Nitab4.5_0001192g0080.1	Nitab4.5_0003062g0020
Nitab4.5_0002456g0060.1	Nitab4.5_0001192g0080
Nitab4.5_0002222g0050.1	Nitab4.5_0002456g0060
Nitab4.5_0000270g0110.1	Nitab4.5_0002222g0050
Nitab4.5_0000113g0160.1	Nitab4.5_0000270g0110
Nitab4.5_0004288g0030.1	Nitab4.5_0000113g0160
Nitab4.5_0001105g0110.1	Nitab4.5_0004288g0030
Nitab4.5_0001895g0040.1	Nitab4.5_0001105g0110
Nitab4.5_0002326g0140.1	Nitab4.5_0001895g0040
Nitab4.5_0001105g0070.1	Nitab4.5_0002326g0140
Nitab4.5_0000441g0100.1	Nitab4.5_0001105g0070
Nitab4.5_0000446g0030.1	Nitab4.5_0000441g0100
Nitab4.5_0002177g0120.1	Nitab4.5_0000446g0030
Nitab4.5_0000246g0100.1	Nitab4.5_0002177g0120
Nitab4.5_0000038g0090.1	Nitab4.5_0000246g0100
Nitab4.5_0001607g0050.1	Nitab4.5_0000038g0090
Nitab4.5_0001891g0050.1	Nitab4.5_0001607g0050
Nitab4.5_0001320g0130.1	Nitab4.5_0001891g0050
Nitab4.5_0000532g0070.1	Nitab4.5_0001320g0130
Nitab4.5_0000218g0110.1	Nitab4.5_0000532g0070
Nitab4.5_0002211g0130.1	Nitab4.5_0000218g0110
Nitab4.5_0000845g0210.1	Nitab4.5_0002211g0130
Nitab4.5_0001921g0030.1	Nitab4.5_0000845g0210
Nitab4.5_0004129g0050.1	Nitab4.5_0001921g0030
Nitab4.5_0005601g0010.1	Nitab4.5_0004129g0050
Nitab4.5_0002394g0010.1	Nitab4.5_0005601g0010
Nitab4.5_0004038g0010.1	Nitab4.5_0002394g0010
Nitab4.5_0000517g0020.1	Nitab4.5_0004038g0010
Nitab4.5_0001777g0030.1	Nitab4.5_0000517g0020
Nitab4.5_0001360g0070.1	Nitab4.5_0001777g0030
Nitab4.5_0002388g0040.1	Nitab4.5_0001360g0070
Nitab4.5_0002450g0150.1	Nitab4.5_0002388g0040
Nitab4.5_0006356g0040.1	Nitab4.5_0002450g0150
Nitab4.5_0000209g0210.1	Nitab4.5_0006356g0040
Nitab4.5_0002046g0110.1	Nitab4.5_0000209g0210
Nitab4.5_0000786g0190.1	Nitab4.5_0002046g0110
Nitab4.5_0001373g0090.1	Nitab4.5_0000786g0190
Nitab4.5_0000751g0070.1	Nitab4.5_0001373g0090
Nitab4.5_0000093g0040.1	Nitab4.5_0000751g0070
Nitab4.5_0000256g0270.1	Nitab4.5_0000093g0040
Nitab4.5_0001068g0090.1	Nitab4.5_0000256g0270
Nitab4.5_0004251g0020.1	Nitab4.5_0001068g0090
Nitab4.5_0000137g0340.1	Nitab4.5_0004251g0020
Nitab4.5_0002257g0050.1	Nitab4.5_0000137g0340
Nitab4.5_0003212g0020.1	Nitab4.5_0002257g0050
Nitab4.5_0001160g0170.1	Nitab4.5_0003212g0020
Nitab4.5_0000256g0190.1	Nitab4.5_0001160g0170
Nitab4.5_0001101g0160.1	Nitab4.5_0000256g0190
Nitab4.5_0000073g0270.1	Nitab4.5_0001101g0160
Nitab4.5_0001921g0020.1	Nitab4.5_0000073g0270
Nitab4.5_0000936g0010.1	Nitab4.5_0001921g0020
Nitab4.5_0000319g0150.1	Nitab4.5_0000936g0010
Nitab4.5_0001485g0010.1	Nitab4.5_0000319g0150
Nitab4.5_0000107g0090.1	Nitab4.5_0001485g0010
Nitab4.5_0007834g0030.1	Nitab4.5_0000107g0090
Nitab4.5_0000472g0340.1	Nitab4.5_0007834g0030
Nitab4.5_0003465g0080.1	Nitab4.5_0000472g0340
Nitab4.5_0001959g0030.1	Nitab4.5_0003465g0080
Nitab4.5_0000715g0160.1	Nitab4.5_0001959g0030
Nitab4.5_0000041g0140.1	Nitab4.5_0000715g0160
Nitab4.5_0000441g0070.1	Nitab4.5_0000041g0140
Nitab4.5_0002354g0110.1	Nitab4.5_0000441g0070
Nitab4.5_0001780g0140.1	Nitab4.5_0002354g0110
Nitab4.5_0000100g0280.1	Nitab4.5_0001780g0140
Nitab4.5_0000151g0270.1	Nitab4.5_0000100g0280
Nitab4.5_0001383g0040.1	Nitab4.5_0000151g0270
Nitab4.5_0000036g0420.1	Nitab4.5_0001383g0040
Nitab4.5_0001229g0120.1	Nitab4.5_0000036g0420
Nitab4.5_0000037g0180.1	Nitab4.5_0001229g0120
Nitab4.5_0006246g0020.1	Nitab4.5_0000037g0180
Nitab4.5_0003869g0010.1	Nitab4.5_0006246g0020
Nitab4.5_0000179g0010.1	Nitab4.5_0003869g0010
Nitab4.5_0000812g0070.1	Nitab4.5_0000179g0010
Nitab4.5_0000224g0060.1	Nitab4.5_0000812g0070
Nitab4.5_0002465g0050.1	Nitab4.5_0000224g0060
Nitab4.5_0000036g0040.1	Nitab4.5_0002465g0050
Nitab4.5_0000297g0150.1	Nitab4.5_0000036g0040
Nitab4.5_0003434g0040.1	Nitab4.5_0000297g0150
Nitab4.5_0003463g0050.1	Nitab4.5_0003434g0040
Nitab4.5_0001600g0120.1	Nitab4.5_0003463g0050
Nitab4.5_0002285g0060.1	Nitab4.5_0001600g0120
Nitab4.5_0000400g0030.1	Nitab4.5_0002285g0060
Nitab4.5_0000568g0030.1	Nitab4.5_0000400g0030
Nitab4.5_0000693g0040.1	Nitab4.5_0000568g0030
Nitab4.5_0000130g0040.1	Nitab4.5_0000693g0040
Nitab4.5_0000021g0570.1	Nitab4.5_0000130g0040
Nitab4.5_0000283g0070.1	Nitab4.5_0000021g0570
Nitab4.5_0000359g0070.1	Nitab4.5_0000283g0070
Nitab4.5_0000714g0030.1	Nitab4.5_0000359g0070
Nitab4.5_0002739g0080.1	Nitab4.5_0000714g0030
Nitab4.5_0001603g0050.1	Nitab4.5_0002739g0080
Nitab4.5_0003173g0030.1	Nitab4.5_0001603g0050
Nitab4.5_0001320g0160.1	Nitab4.5_0003173g0030
Nitab4.5_0005061g0040.1	Nitab4.5_0001320g0160
Nitab4.5_0001085g0150.1	Nitab4.5_0005061g0040
Nitab4.5_0000109g0370.1	Nitab4.5_0001085g0150
Nitab4.5_0000036g0330.1	Nitab4.5_0000109g0370
Nitab4.5_0006318g0060.1	Nitab4.5_0000036g0330
Nitab4.5_0003774g0010.1	Nitab4.5_0006318g0060
Nitab4.5_0001780g0130.1	Nitab4.5_0003774g0010
Nitab4.5_0000277g0060.1	Nitab4.5_0001780g0130
Nitab4.5_0000462g0160.1	Nitab4.5_0000277g0060
Nitab4.5_0001711g0010.1	Nitab4.5_0000462g0160
Nitab4.5_0001146g0230.1	Nitab4.5_0001711g0010
Nitab4.5_0000564g0130.1	Nitab4.5_0001146g0230
Nitab4.5_0003138g0030.1	Nitab4.5_0000564g0130
Nitab4.5_0002289g0120.1	Nitab4.5_0003138g0030
Nitab4.5_0000008g0720.1	Nitab4.5_0002289g0120
Nitab4.5_0000767g0070.1	Nitab4.5_0000008g0720
Nitab4.5_0000161g0100.1	Nitab4.5_0000767g0070
Nitab4.5_0003151g0070.1	Nitab4.5_0000161g0100
Nitab4.5_0000140g0190.1	Nitab4.5_0003151g0070
Nitab4.5_0001421g0090.1	Nitab4.5_0000140g0190
Nitab4.5_0002172g0010.1	Nitab4.5_0001421g0090
Nitab4.5_0000355g0010.1	Nitab4.5_0002172g0010
Nitab4.5_0000381g0350.1	Nitab4.5_0000355g0010
Nitab4.5_0000051g0270.1	Nitab4.5_0000381g0350
Nitab4.5_0002217g0010.1	Nitab4.5_0000051g0270
Nitab4.5_0002918g0050.1	Nitab4.5_0002217g0010
Nitab4.5_0003668g0020.1	Nitab4.5_0002918g0050
Nitab4.5_0002347g0120.1	Nitab4.5_0003668g0020
Nitab4.5_0001820g0070.1	Nitab4.5_0002347g0120
Nitab4.5_0000312g0070.1	Nitab4.5_0001820g0070
Nitab4.5_0000312g0400.1	Nitab4.5_0000312g0070
Nitab4.5_0000407g0050.1	Nitab4.5_0000312g0400
Nitab4.5_0000424g0020.1	Nitab4.5_0000407g0050
Nitab4.5_0001040g0020.1	Nitab4.5_0000424g0020
Nitab4.5_0000016g0050.1	Nitab4.5_0001040g0020
Nitab4.5_0003309g0070.1	Nitab4.5_0000016g0050
Nitab4.5_0001044g0030.1	Nitab4.5_0003309g0070
Nitab4.5_0000712g0270.1	Nitab4.5_0001044g0030
Nitab4.5_0000407g0120.1	Nitab4.5_0000712g0270
Nitab4.5_0002184g0040.1	Nitab4.5_0000407g0120
Nitab4.5_0000039g0130.1	Nitab4.5_0002184g0040
Nitab4.5_0001229g0090.1	Nitab4.5_0000039g0130
	Nitab4.5_0001229g0090
